# Supplementary material for: One F atom matters: synthesis, aggregation-induced emission and stimuli-responsiveness of three isomers of fluoro/formyl substituted tetraphenylethene derivatives
Source: Royal Society of Chemistry journal article supplement (doi:10.1039/d2tc00798c), 2022-01-01
Supplement: d2tc00798c1.pdf [file d2tc00798c1.pdf]

## Supplementary Information

### One F atom matters: synthesis, aggregation-induced emission and stimuli responsiveness of three isomers of fluoro/formyl substituted tetraphenylethene derivatives

Tianrui Li<sup>a</sup>, Jinling Miao<sup>\*b</sup>, Chunyue Xu<sup>a</sup>, Yong Nie<sup>\*a</sup>, Wei Liu<sup>a</sup>, Yexin Li<sup>b</sup>, Guangning Liu<sup>b</sup>,  
Xuchuan Jiang<sup>\*a</sup>

<sup>a</sup>Institute for Smart Materials & Engineering, University of Jinan, No. 336 Nanxinzhuan West Road,  
250022 Jinan, P. R. China

<sup>b</sup>School of Chemistry and Chemical Engineering, Shandong Provincial Key Laboratory of Fluorine  
Chemistry and Chemical Materials, University of Jinan, No. 336 Nanxinzhuan West Road, 250022  
Jinan, P. R. China

### Contents

Experimental section

Table S1. Crystal data and structure refinement of **2**

Table S2. Crystal data of **3**

Table S3. Bond lengths and torsion angles for **2** and **3**

Table S4. Diagrams of the frontier MOs of **1-3** and their non-fluorinated analogs

Table S5. Energy level of the HOMO/LUMO orbitals and HOMO/LUMO energy gap of **1-3** and  
their non-fluorinated analogs

Tables S6-S8. Computed absorption wavelengths and oscillator strengths for **1-3** from TD-DFT  
calculations in THF

Table S9. Emission lifetime data of the solid samples of **1-3**

Table S10. Photophysical data for **1**, **TPE-4CHO**, **2** and **TPE-3CHO** at different temperatures

Table S11. Photophysical data for the silica gel composites with **1**, **TPE-4CHO** and **2** at different  
temperatures

Figs. S1-S3. Absorption spectra of **1-3** in THF by DFT calculation

Figs. S4-S6. PL decay curves of solid samples of **1-3**

Fig. S7. PXRD patterns of **1-3**, **TPE-4CHO** and **TPE-3CHO** before and after grinding, and then  
annealed

Fig. S8. FT-IR spectra of silica gel composites of **1-3**, and **TPE-4CHO** at room temperature

Figs. S9-11. DLS results of the aggregates of compounds **1-3**

Fig. S12. Absorption spectrum of **TPE-2CHO** in THF

Figs. S13-S27. NMR spectra and FT-IR spectra of **1-3** and **TPE-2CHO**

## Experimental section

### General

Standard Schlenk techniques were used for the synthetic reactions under Ar. The solvents were commercially available and used without further purification. IR spectra were recorded in the range 450-4000  $\text{cm}^{-1}$  on a Perkin Elmer Tensor II spectrometer using KBr pellets.  $^1\text{H}$ - and  $^{13}\text{C}$ -NMR analyses were performed using a Bruker Avance III 600 MHz spectrometer. As internal references for  $^1\text{H}$ - and  $^{13}\text{C}$ -NMR spectroscopy the signals of  $\text{CDCl}_3$  were used and calculated relative to tetramethylsilane (TMS).  $^{19}\text{F}$ -NMR spectra were recorded in dichloromethane solutions ( $\text{D}_2\text{O}$  was added for locking) on a Bruker AVANCE III 500 spectrometer. Melting points were measured with a SGW X-4 apparatus and are not corrected. The high resolution mass spectra were measured with a Thermo Fisher Scientific LTQ FTICR-MS instrument (DART positive ion mode). UV-Vis spectra were recorded using a UV-9000S spectrometer. Emission spectra were measured with an Edinburgh FLS920 fluorimeter using a front-face solid sample configuration for solid samples. Absolute fluorescence quantum yields were obtained using an integrating sphere. For the variable temperature emission spectra of the powder samples, a temperature controller (TCB1402C) made by Techcomp company was applied, and for the silica gel composites on TLC plates, a hot plate was used to heat up the TLC plates and the emission spectra were then measured as soon as possible. The dynamic light scattering measurements were conducted on a Malvern Zetasizer Nano ZS.

### Synthesis of compound 1

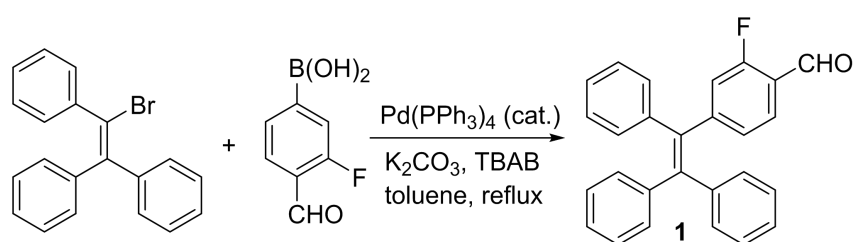

Under argon, triphenylvinylbromide (670.14 mg, 2.00 mmol), tetrabutylammonium bromide (89 mg, 0.27 mmol), 3-fluoro-4-formylphenyl boronic acid (403.2 mg, 2.40 mmol), anhydrous  $\text{K}_2\text{CO}_3$  (830.2 mg, 6.00 mmol),  $\text{Pd}(\text{PPh}_3)_4$  (106.0 mg, 0.092 mmol) and 20 mL of toluene and 5 mL of water were added to a Schlenk tube. The reaction mixture was stirred under reflux (oil bath 120  $^\circ\text{C}$ ) for 6 h. A small amount of  $\text{CH}_2\text{Cl}_2$  was added and the mixture was filtered, from the filtrate the organic phase was separated, and the water phase was extracted with  $\text{CH}_2\text{Cl}_2$  (20 mL  $\times$  2). The organic phases were combined and dried with anhydrous  $\text{Na}_2\text{SO}_4$  and separated using column chromatography (eluent

CH<sub>2</sub>Cl<sub>2</sub>/hexane = 1/1, *V/V*) to obtain a yellow greenish solid (compound **1**).

**1**: 692 mg, yield 91.5%; m.p.183.1-183.9 °C; *R<sub>f</sub>* = 0.52 (eluent CH<sub>2</sub>Cl<sub>2</sub>/hexane = 1/1, *V/V*); IR (KBr, *v/cm*<sup>-1</sup>): 3071, 3051, 2854, 2760, 1690 (C=O), 1612, 1557, 1490, 1442, 1261 (C-F); <sup>1</sup>H NMR (600 MHz, CDCl<sub>3</sub>) δ 10.23 (s, 1H), 7.58 (t, *J* = 7.7 Hz, 1H), 7.19 – 7.08 (m, 10H), 7.07 – 6.96 (m, 7H), 6.92 (d, *J* = 12 Hz, 1H), 6.82 (dd, *J* = 11.6, 1.6 Hz, 1H); <sup>13</sup>C NMR (151 MHz, CDCl<sub>3</sub>) δ 187.03 (d, *J* = 5.03 Hz), 165.26, 163.55, 153.24, 153.18, 144.06, 142.82, 142.73, 142.45, 138.85 (d, *J* = 1.34 Hz), 131.35, 131.31, 131.27, 128.23 (d, *J* = 5.03 Hz), 127.96, 127.95, 127.92, 127.88, 127.87, 127.57, 127.25, 122.20, 122.14, 119.18, 119.04; <sup>19</sup>F NMR (377 MHz, CH<sub>2</sub>Cl<sub>2</sub>) δ -123.52; DART-MS *m/z* (%): calcd. for C<sub>27</sub>H<sub>19</sub>FO, 379.1493 [M+H]<sup>+</sup>, found 379.1487.

### Synthesis of compound **2**

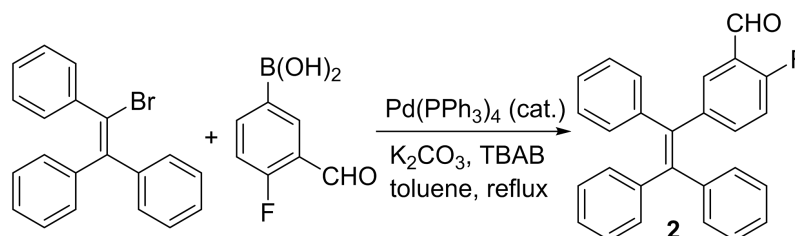

Under argon, triphenylvinylbromide (672.7 mg, 2.0 mmol), tetrabutylammonium bromide (92.1 mg, 0.28 mmol), 4-fluoro-3-formylphenyl boronic acid (407.8 mg, 2.40 mmol), anhydrous K<sub>2</sub>CO<sub>3</sub> (831.7 mg, 6.0 mmol), Pd(PPh<sub>3</sub>)<sub>4</sub> (102 mg, 0.088 mmol) and 20 mL of toluene and 5 mL of water were added to a Schlenk tube. The reaction mixture was stirred under reflux (oil bath 120 °C) for 16 h. A small amount of CH<sub>2</sub>Cl<sub>2</sub> was added and the mixture was filtered, from the filtrate the organic phase was separated, and the water phase was extracted with CH<sub>2</sub>Cl<sub>2</sub> (20 mL × 2). The organic phases were combined and dried with anhydrous Na<sub>2</sub>SO<sub>4</sub> and separated using column chromatography (eluent CH<sub>2</sub>Cl<sub>2</sub>/hexane = 1/1, *V/V*) to obtain a white solid (compound **2**).

**2**: 722 mg, yield 95.5%; m.p.157.6-158.1 °C; *R<sub>f</sub>* = 0.33 (eluent CH<sub>2</sub>Cl<sub>2</sub>/hexane = 1/1, *V/V*); IR (KBr, *v/cm*<sup>-1</sup>): 3073, 3020, 2860, 2763, 1693 (C=O), 1599, 1489, 1258 (C-F); <sup>1</sup>H NMR (600 MHz, CDCl<sub>3</sub>) δ 10.19 (s, 1H), 7.52 (dd, *J* = 6.7, 2.4 Hz, 1H), 7.15 – 7.08 (m, 10H), 7.04 – 6.97 (m, 6H), 6.89 (dd, *J* = 10.1, 8.6 Hz, 1H); <sup>13</sup>C NMR (151 MHz, CDCl<sub>3</sub>) δ 187.30 (d, *J* = 6.10 Hz), 164.02, 162.30, 143.10, 143.06, 142.72, 142.66, 140.80 (d, *J* = 4.04 Hz), 139.30, 139.24, 138.69, 131.62, 131.38, 131.30, 131.26, 128.13, 127.90, 127.07 (d, *J* = 4.45 Hz), 126.94, 123.73, 123.68, 116.11, 115.97; <sup>19</sup>F NMR (377 MHz, CH<sub>2</sub>Cl<sub>2</sub>) δ -124.92; DART-MS *m/z* (%): calcd. for C<sub>27</sub>H<sub>19</sub>FO, 379.1493 [M+H]<sup>+</sup>, found 379.1487.

### Synthesis of compound 3

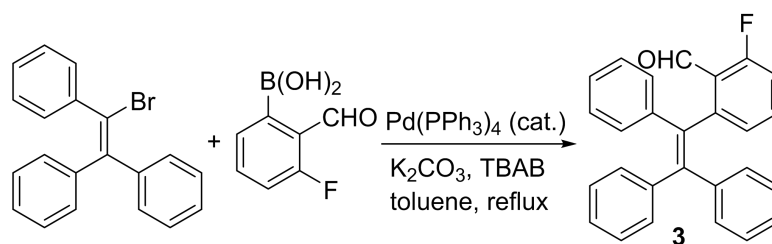

Under argon, triphenylvinylbromide (671.2 mg, 2.0 mmol), tetrabutylammonium bromide (79.8 mg, 0.25 mmol), 3-fluoro-2-formylphenyl boronic acid (403.6 mg, 2.40 mmol), anhydrous  $\text{K}_2\text{CO}_3$  (830.3 mg, 6.0 mmol),  $\text{Pd}(\text{PPh}_3)_4$  (108.8 mg, 0.094 mmol) and 20 mL of toluene and 5 mL of water were added to a Schlenk tube. The reaction mixture was stirred under reflux (oil bath 120 °C) for 16 h. A small amount of  $\text{CH}_2\text{Cl}_2$  was added and the mixture was filtered, from the filtrate the organic phase was separated, and the water phase was extracted with  $\text{CH}_2\text{Cl}_2$  (20 mL  $\times$  2). The organic phases were combined and dried with anhydrous  $\text{Na}_2\text{SO}_4$  and separated using column chromatography (eluent  $\text{CH}_2\text{Cl}_2/\text{hexane} = 1/1$ ,  $V/V$ ) to obtain a light yellow solid (compound 3).

**3:** 638.2 mg, yield 84 %; m.p. 105.7-106.3 °C;  $R_f = 0.31$  (eluent  $\text{CH}_2\text{Cl}_2/\text{hexane} = 1/1$ ,  $V/V$ ); IR (KBr,  $\nu/\text{cm}^{-1}$ ): 3071, 3051, 2854, 2767, 1699 (C=O), 1603, 1568, 1490, 1465, 1240 (C-F);  $^1\text{H}$  NMR (600 MHz,  $\text{CDCl}_3$ )  $\delta$  10.25 (s, 1H), 7.35 (td,  $J = 8.0, 5.4$  Hz, 1H), 7.14 (t,  $J = 3.42$  Hz, 4H), 7.08 (m, 9H), 7.03 – 6.98 (m, 4H), 6.95 (m, 3H);  $^{13}\text{C}$  NMR (151 MHz,  $\text{CDCl}_3$ )  $\delta$  188.50 (d,  $J = 4.60$  Hz), 164.61, 162.89, 147.77, 143.25, 142.83, 142.52, 141.87, 137.07, 134.46, 134.39, 131.27, 130.98, 130.70, 128.95 (d,  $J = 3.29$  Hz), 127.98, 127.88, 127.17 (d,  $J = 3.87$  Hz), 126.98, 123.73, 123.68, 115.26, 115.12;  $^{19}\text{F}$  NMR (377 MHz,  $\text{CH}_2\text{Cl}_2$ )  $\delta$  -118.94; DART-MS  $m/z$  (%): calcd. for  $\text{C}_{27}\text{H}_{19}\text{FO}$ , 379.1493  $[\text{M}+\text{H}]^+$ , found 379.1486.

### Synthesis of compound TPE-2CHO

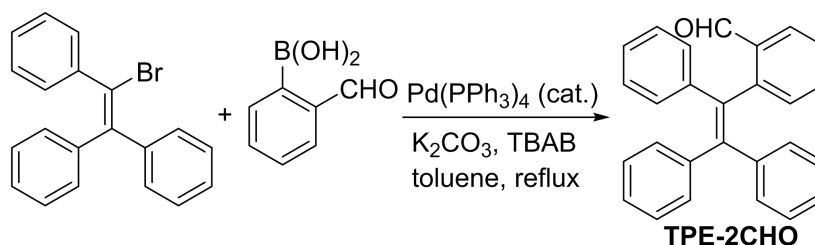

Under argon, triphenylvinylbromide (671.7 mg, 2.0 mmol), tetrabutylammonium bromide (66.7 mg, 0.2 mmol), 2-formylphenyl boronic acid (329.9 mg, 2.20 mmol), anhydrous  $\text{K}_2\text{CO}_3$  (832.3 mg, 6.0 mmol),  $\text{Pd}(\text{PPh}_3)_4$  (115.8 mg, 0.1 mmol), and 20 mL of toluene and 5 mL of water were added to a

Schlenk tube. The reaction mixture was stirred under reflux (oil bath 120 °C) for 12 h. A small amount of CH<sub>2</sub>Cl<sub>2</sub> was added and the reaction mixture was filtered, from the filtrate the organic phase was separated, and the water phase was extracted with CH<sub>2</sub>Cl<sub>2</sub> (20 mL × 2). The organic phases were combined and dried with anhydrous Na<sub>2</sub>SO<sub>4</sub> and separated using column chromatography (eluent CH<sub>2</sub>Cl<sub>2</sub>/hexane = 1/1, *V/V*) to obtain a light yellow solid (compound **TPE-2CHO**).

**TPE-2CHO**: 615.2 mg, yield 85 %; m.p. 95.7-96.0 °C; *R*<sub>f</sub> = 0.41 (eluent CH<sub>2</sub>Cl<sub>2</sub>/hexane = 1/1, *V/V*); IR (KBr, *v*/cm<sup>-1</sup>): 3051, 3024, 2833, 2739, 1693 (C=O), 1593, 1441, 754, 700; <sup>1</sup>H NMR (600 MHz, CDCl<sub>3</sub>) δ 10.33 (s, 1H), 7.73 (m, 1H), 7.42 (td, *J* = 6.3, 7.6 Hz, 1H), 7.27 (t, *J* = 8.06 Hz, 1H), 7.21 (d, *J* = 3.42 Hz, 4H), 7.20, 7.16 - 7.15 (m, 3H), 7.10 - 7.07 (m, 5H), 7.04 - 7.03 (m, 3H), 7.01 - 7.00 (m, 2H), 6.93 - 6.91 (m, 2H); <sup>13</sup>C NMR (151 MHz, CDCl<sub>3</sub>) δ 191.73 (d, *J* = 3.04 Hz), 147.16, 144.55, 142.69, 142.51, 142.47, 136.31, 134.13, 133.49, 132.66, 131.14, 130.89, 130.82, 127.97, 127.95, 127.85, 127.64, 127.44, 127.12, 126.99, 126.90; EI-MS *m/z* (%): calcd. for C<sub>27</sub>H<sub>21</sub>O, 361.46 [M+H]<sup>+</sup>, found 361.40 (100%).

**Table S1** Crystal data and structure refinement for **2**

|                                           |                                    |
|-------------------------------------------|------------------------------------|
| Empirical formula                         | C <sub>27</sub> H <sub>19</sub> FO |
| Formula weight                            | 378.42                             |
| Temperature/K                             | 293(2)                             |
| Crystal system                            | monoclinic                         |
| Space group                               | P2 <sub>1</sub>                    |
| <i>a</i> /Å                               | 10.2779(7)                         |
| <i>b</i> /Å                               | 9.1125(5)                          |
| <i>c</i> /Å                               | 11.3260(6)                         |
| <i>α</i> /°                               | 90                                 |
| <i>β</i> /°                               | 106.418(7)                         |
| <i>γ</i> /°                               | 90                                 |
| Volume/Å <sup>3</sup>                     | 1017.51(11)                        |
| <i>Z</i>                                  | 2                                  |
| <i>ρ</i> <sub>calc</sub> /cm <sup>3</sup> | 1.235                              |
| <i>μ</i> /mm <sup>-1</sup>                | 0.08                               |
| F(000)                                    | 396                                |
| Crystal size/mm <sup>3</sup>              | 0.1 × 0.1 × 0.1                    |

|                                                |                                                                    |
|------------------------------------------------|--------------------------------------------------------------------|
| Radiation                                      | Mo K $\alpha$ ( $\lambda = 0.71073$ )                              |
| 2 $\Theta$ range for data collection/ $^\circ$ | 6.51 to 50.698                                                     |
| Index ranges                                   | $-12 \leq h \leq 12$ , $-10 \leq k \leq 10$ , $-13 \leq l \leq 13$ |
| Reflections collected                          | 6090                                                               |
| Independent reflections                        | 3498 [ $R_{\text{int}} = 0.0276$ , $R_{\text{sigma}} = 0.0535$ ]   |
| Data/restraints/parameters                     | 3498/1/262                                                         |
| Goodness-of-fit on $F^2$                       | 0.97                                                               |
| Final R indexes [ $I \geq 2\sigma(I)$ ]        | $R_1 = 0.0485$ , $wR_2 = 0.1093$                                   |
| Final R indexes [all data]                     | $R_1 = 0.0836$ , $wR_2 = 0.1258$                                   |
| Largest diff. peak/hole / e $\text{\AA}^{-3}$  | 0.27/-0.18                                                         |
| Flack parameter                                | -0.1(7)                                                            |
| CCDC deposition number                         | 2100022                                                            |

**Table S2** Crystal data for **3**

|                                    |                                       |
|------------------------------------|---------------------------------------|
| Empirical formula                  | C <sub>27</sub> H <sub>19</sub> FO    |
| Formula weight                     | 378.42                                |
| Temperature/K                      | 293(2)                                |
| Crystal system                     | monoclinic                            |
| Space group                        | P2 <sub>1</sub> /n                    |
| a/ $\text{\AA}$                    | 12.0247(7)                            |
| b/ $\text{\AA}$                    | 9.3443(5)                             |
| c/ $\text{\AA}$                    | 21.2636(16)                           |
| $\alpha/^\circ$                    | 90                                    |
| $\beta/^\circ$                     | 93.711(6)                             |
| $\gamma/^\circ$                    | 90                                    |
| Volume/ $\text{\AA}^3$             | 2384.2(3)                             |
| Z                                  | 4                                     |
| $\rho_{\text{calc}}/\text{g/cm}^3$ | 1.053                                 |
| $\mu/\text{mm}^{-1}$               | 0.07                                  |
| F(000)                             | 1096                                  |
| Crystal size/ $\text{mm}^3$        | $0.25 \times 0.15 \times 0.1$         |
| Radiation                          | Mo K $\alpha$ ( $\lambda = 0.71073$ ) |

**Table S3** Selected bond lengths (Å) and torsion angles (°) for **2** and **3**.

|                         | <b>2</b>                        | <b>3</b>                         |
|-------------------------|---------------------------------|----------------------------------|
| bond lengths            | C8-C15 1.355                    | C8-C15 1.347                     |
|                         | C3-F2 1.361                     | C3-F1 1.355                      |
|                         | C6-C8 (F-Ar) 1.478              | C7-C8 (F-Ar) 1.502               |
|                         | C8-C9 (Ph) 1.488                | C8-C9 (Ph) 1.507                 |
|                         | C15-C16 (Ph) 1.486              | C15-C16 (Ph) 1.496               |
|                         | C15-C22 (Ph) 1.488              | C15-C22 (Ph) 1.497               |
| Selected torsion angles | C15-C8-C6-C5 (C=C-(F-Ar)) 42.86 | C15-C8-C7-C6 (C=C-(F-Ar)) -69.81 |
|                         | C15-C8-C9-C14 (C=C-Ph) 50.855   | C15-C8-C9-C14 (C=C-Ph) -51.44    |
|                         | C8-C15-C16-C17 (C=C-Ph) 47.566  | C8-C15-C16-C17 (C=C-Ph) -46.76   |
|                         | C8-C15-C22-C27 (C=C-Ph) 48.295  | C8-C15-C22-C27 (C=C-Ph) -51.61   |

**Table S4** Diagrams of the frontier MOs of **1-3** and their non-fluorinated analogs <sup>a</sup>

| Compounds       | Frontier orbitals and energy gap                                |
|-----------------|-----------------------------------------------------------------|
| <b>1</b>        | <p>HOMO E = -5.68 eV<br/>LUMO E = -2.01 eV<br/>ΔE = 3.67 eV</p> |
| <b>TPE-4CHO</b> | <p>HOMO E = -5.58 eV<br/>LUMO E = -1.90 eV<br/>ΔE = 3.68 eV</p> |
| <b>2</b>        | <p>HOMO E = -5.60 eV<br/>LUMO E = -1.73 eV<br/>ΔE = 3.87 eV</p> |
| <b>TPE-3CHO</b> | <p>HOMO E = -5.56 eV<br/>LUMO E = -1.67 eV<br/>ΔE = 3.89 eV</p> |





|    |        |        |        |                                                                                                                                                                                                |
|----|--------|--------|--------|------------------------------------------------------------------------------------------------------------------------------------------------------------------------------------------------|
| 6  | 4.1557 | 298.34 | 0.0046 | HOMO - 1→LUMO (83.2%)<br>HOMO - 3→LUMO (82.0%)<br>HOMO - 2→LUMO (7.8%)                                                                                                                         |
| 7  | 4.3635 | 284.14 | 0.0140 | HOMO - 1→LUMO (5.0%)<br>HOMO - 7→LUMO (8.1%)<br>HOMO - 6→LUMO (13.4%)<br>HOMO - 5→LUMO (7.1%)<br>HOMO - 4→LUMO (52.6%)<br>HOMO - 3→LUMO (2.2%)<br>HOMO→LUMO + 2 (6.1%)<br>HOMO→LUMO + 4 (2.6%) |
| 8  | 4.3975 | 281.94 | 0.0285 | HOMO - 7→LUMO (6.8%)<br>HOMO - 6→LUMO (32.6%)<br>HOMO - 5→LUMO (4.0%)<br>HOMO - 4→LUMO (25.3%)<br>HOMO→LUMO + 2 (26.6%)                                                                        |
| 9  | 4.5014 | 275.44 | 0.1000 | HOMO - 7→LUMO (40.9%)<br>HOMO - 6→LUMO (37.5%)<br>HOMO→LUMO + 2 (9.1%)<br>HOMO→LUMO + 3 (7.1%)                                                                                                 |
| 10 | 4.5977 | 269.67 | 0.1660 | HOMO - 7→LUMO (33.3%)<br>HOMO - 6→LUMO (6.5%)<br>HOMO - 4→LUMO (2.2%)<br>HOMO→LUMO + 2 (48.5%)                                                                                                 |

<sup>a</sup> calculated at the B3LYP/6-31G (d, p) level of theory.

**Table S7** Computed excitation energies and oscillator strengths for **2** from TD-DFT calculations in

| THF <sup>a</sup> |        |                |        |                                                                                                                                |
|------------------|--------|----------------|--------|--------------------------------------------------------------------------------------------------------------------------------|
| state            | E (eV) | $\lambda$ (nm) | $f$    | transitions                                                                                                                    |
| 1                | 3.1996 | 387.50         | 0.0322 | HOMO→LUMO (98.5%)                                                                                                              |
| 2                | 3.6508 | 339.61         | 0.4705 | HOMO→LUMO + 1 (97.3%)                                                                                                          |
| 3                | 3.6859 | 336.38         | 0.0087 | HOMO - 6→LUMO (3.7%)<br>HOMO - 5→LUMO (54.9%)<br>HOMO - 4→LUMO (33.3%)                                                         |
| 4                | 4.3424 | 285.52         | 0.0185 | HOMO - 2→LUMO (12.8%)<br>HOMO - 1→LUMO + 1 (80.2%)                                                                             |
| 5                | 4.3859 | 282.69         | 0.0308 | HOMO - 3→LUMO (2.4%)<br>HOMO - 2→LUMO (11.8%)<br>HOMO - 1→LUMO + 1 (6.8%)<br>HOMO - 1→LUMO + 1 (6.8%)<br>HOMO→LUMO + 2 (64.8%) |
| 6                | 4.4346 | 279.58         | 0.0151 | HOMO - 3→LUMO (4.7%)<br>HOMO - 2→LUMO (65.9%)<br>HOMO - 2→LUMO + 1 (2.7%)                                                      |

|    |        |        |        |                                                                                                                                                                                                       |
|----|--------|--------|--------|-------------------------------------------------------------------------------------------------------------------------------------------------------------------------------------------------------|
| 7  | 4.5095 | 274.94 | 0.0432 | HOMO - 1→LUMO + 1 (6.3%)<br>HOMO - 1→LUMO + 2 (14.9%)<br>HOMO - 3→LUMO (80.4%)<br>HOMO - 1→LUMO +1 (3.5%)<br>HOMO→LUMO +2 (8.9%)                                                                      |
| 8  | 4.5656 | 271.56 | 0.0379 | HOMO - 6→LUMO (3.2%)<br>HOMO - 4→LUMO (3.3%)<br>HOMO - 4→LUMO + 1 (2.2%)<br>HOMO - 3→LUMO (6.1%)<br>HOMO - 3→LUMO + 1 (4.7%)<br>HOMO - 1→LUMO + 1(10.3%)<br>HOMO→LUMO + 3 (61.0%)                     |
| 9  | 4.5826 | 270.55 | 0.0403 | HOMO - 3→LUMO (2.0%)<br>HOMO - 1→LUMO (2.1%)<br>HOMO - 1→LUMO + 1 (59.8%)<br>HOMO→LUMO + 2 (2.7%)<br>HOMO→LUMO + 3 (12.0%)<br>HOMO→LUMO + 4 (11.4%)<br>HOMO→LUMO + 5 (2.5%)                           |
| 10 | 4.6246 | 268.10 | 0.0757 | HOMO - 7→LUMO (15.5%)<br>HOMO - 6→LUMO (7.6%)<br>HOMO - 5→LUMO (10.0%)<br>HOMO - 4→LUMO (23.5%)<br>HOMO - 2→LUMO + 1 (12.6%)<br>HOMO→LUMO + 3 (11.4%)<br>HOMO→LUMO + 4 (4.6%)<br>HOMO→LUMO + 6 (2.0%) |

<sup>a</sup> calculated at the B3LYP/6-31G (d, p) level of theory.

**Table S8** Computed excitation energies and oscillator strengths for **3** from TD-DFT calculations in

THF <sup>a</sup>

| state | E (eV) | $\lambda$ (nm) | $f$    | transitions                                                                                                                                        |
|-------|--------|----------------|--------|----------------------------------------------------------------------------------------------------------------------------------------------------|
| 1     | 3.0910 | 401.11         | 0.1101 | HOMO→LUMO (97.2%)                                                                                                                                  |
| 2     | 3.4807 | 356.21         | 0.0048 | HOMO - 7→LUMO (3.9%)<br>HOMO - 6→LUMO (2.1%)<br>HOMO - 4→LUMO (51.9%)<br>HOMO - 4→LUMO + 1 (3.5%)<br>HOMO - 2→LUMO (6.0%)<br>HOMO - 1→LUMO (25.0%) |
| 3     | 3.9234 | 316.01         | 0.3431 | HOMO→LUMO +1 (96.8%)                                                                                                                               |
| 4     | 4.1228 | 300.73         | 0.0459 | HOMO - 6→LUMO (2.3%)<br>HOMO - 4→LUMO (7.9%)<br>HOMO - 2→LUMO (23.7%)<br>HOMO - 1→LUMO (59.8%)                                                     |

|    |        |        |        |                                                                                                                                                     |
|----|--------|--------|--------|-----------------------------------------------------------------------------------------------------------------------------------------------------|
| 5  | 4.2380 | 292.55 | 0.0199 | HOMO - 3→LUMO (89.7%)<br>HOMO - 2→LUMO (3.5%)<br>HOMO→LUMO +2 (2.5%)                                                                                |
| 6  | 4.2400 | 292.42 | 0.0002 | HOMO - 5→LUMO (2.5%)<br>HOMO - 4→LUMO (18.2%)<br>HOMO - 3→LUMO (3.1%)<br>HOMO - 2→LUMO (62.1%)<br>HOMO - 1→LUMO (9.8%)                              |
| 7  | 4.3995 | 281.82 | 0.0149 | HOMO - 6→LUMO (21.2%)<br>HOMO - 5→LUMO (21.0%)<br>HOMO - 4→LUMO (4.0%)<br>HOMO→LUMO + 2(44.9%)                                                      |
| 8  | 4.4923 | 275.99 | 0.0031 | HOMO - 6→LUMO (19.8%)<br>HOMO - 5→LUMO (61.7%)<br>HOMO→LUMO + 2 (6.3%)<br>HOMO→LUMO + 3 (6.2%)                                                      |
| 9  | 4.5631 | 271.71 | 0.2944 | HOMO - 8→LUMO (2.1%)<br>HOMO - 6→LUMO (45.6%)<br>HOMO - 5→LUMO (3.4%)<br>HOMO - 4→LUMO (2.3%)<br>HOMO→LUMO +2 (48.5%)                               |
| 10 | 4.6529 | 266.46 | 0.0032 | HOMO - 8→LUMO (3.7%)<br>HOMO - 7→LUMO (73.7%)<br>HOMO - 4→LUMO (5.0%)<br>HOMO - 4→LUMO + 1 (3.7%)<br>HOMO - 1→LUMO +1 (3.0%)<br>HOMO→LUMO +4 (4.5%) |

<sup>a</sup> calculated at the B3LYP/6-31G (d, p) level of theory.

#### Reference for the Gaussian package for the DFT calculations:

M. J. Frisch, G. W. Trucks, H. B. Schlegel, G. E. Scuseria, M. A. Robb, J. R. Cheeseman, G. Scalmani, V. Barone, B. Mennucci, G. A. Petersson, H. Nakatsuji, M. Caricato, X. Li, H. P. Hratchian, A. F. Izmaylov, J. Bloino, G. Zheng, J. L. Sonnenberg, M. Hada, M. Ehara, K. Toyota, R. Fukuda, J. Hasegawa, M. Ishida, T. Nakajima, Y. Honda, O. Kitao, H. Nakai, T. Vreven, J. A. Montgomery, Jr., J. E. Peralta, F. Ogliaro, M. Bearpark, J. J. Heyd, E. Brothers, K. N. Kudin, V. N. Staroverov, R. Kobayashi, J. Normand, K. Raghavachari, A. Rendell, J. C. Burant, S. S. Iyengar, J. Tomasi, M. Cossi, N. Rega, J. M. Millam, M. Klene, J. E. Knox, J. B. Cross, V. Bakken, C. Adamo, J. Jaramillo, R. Gomperts, R. E. Stratmann, O. Yazyev, A. J. Austin, R. Cammi, C. Pomelli, J. W. Ochterski, R. L. Martin, K. Morokuma, V. G. Zakrzewski, G. A. Voth, P. Salvador, J. J. Dannenberg, S. Dapprich, A. D. Daniels, O. Farkas, J. B. Foresman, J. V. Ortiz, J. Cioslowski, and D. J. Fox, Gaussian 09, Revision A.02, Gaussian, Inc., Wallingford CT, 2009.

**Table S9** Emission lifetime data of solid samples of **1-3**

| Compounds | $\tau_1$ (ns) | percent | $\tau_2$ (ns) | percent | $\tau$ (ns) |
|-----------|---------------|---------|---------------|---------|-------------|
| <b>1</b>  | 0.4682        | 86.05   | 2.0303        | 13.95   | 0.69        |
| <b>2</b>  | 0.5165        | 41.64   | 1.0344        | 58.36   | 0.82        |
| <b>3</b>  | 0.2819        | 91.72   | 0.4686        | 8.28    | 0.38        |

**Table S10** Photophysical data for **1**, **TPE-4CHO**, **2** and **TPE-3CHO** at different temperatures

| Compounds       | $\lambda_{em}^a$ (nm) |       |        |        |        |                  |
|-----------------|-----------------------|-------|--------|--------|--------|------------------|
|                 | r. t.                 | 70 °C | 100 °C | 120 °C | 140 °C | cooling to r. t. |
| <b>1</b>        | 482                   | 477   | 474    | 471    | 470    | 481              |
| <b>2</b>        | 460                   | 452   | 451    | 450    | 448    | 458              |
| <b>TPE-3CHO</b> | 462                   | 460   | 458    | 458    | 458    | 458              |
| <b>TPE-4CHO</b> | 486                   | 486   | 486    | -      | 486    | 486              |

<sup>a</sup>  $\lambda_{ex}$  = 380 nm**Table S11** Photophysical data for the silica gel composites with **1**, **TPE-4CHO** and **2** at different temperatures

| Composite       | $\lambda_{em}^a$ (nm) |       |        |        |        |
|-----------------|-----------------------|-------|--------|--------|--------|
|                 | r. t.                 | 70 °C | 100 °C | 120 °C | 140 °C |
| <b>1</b>        | 521                   | 516   | 510    | 503    | 498    |
| <b>2</b>        | 496                   | 501   | 502    | 501    | 501    |
| <b>TPE-4CHO</b> | 512                   | 510   | 512    | 511    | 511    |

<sup>a</sup>  $\lambda_{ex}$  = 380 nm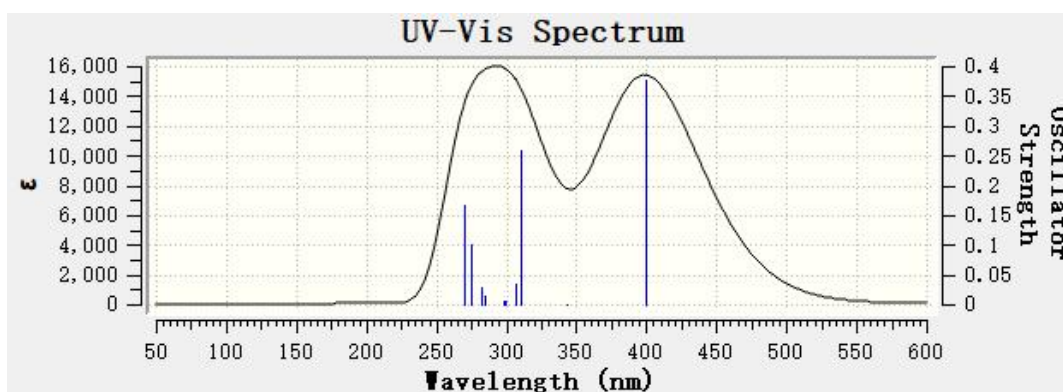**Fig. S1** Absorption spectrum of **1** in THF by DFT calculation

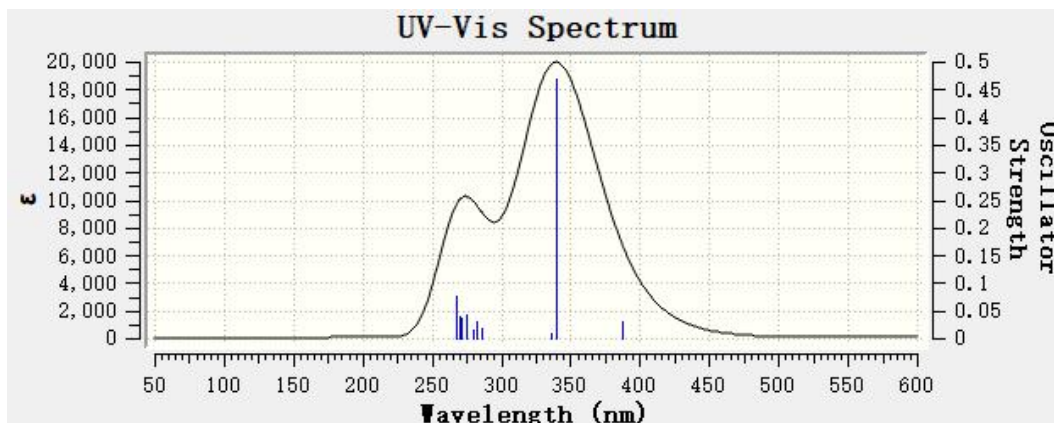

**Fig. S2** Absorption spectrum of **2** in THF by DFT calculation

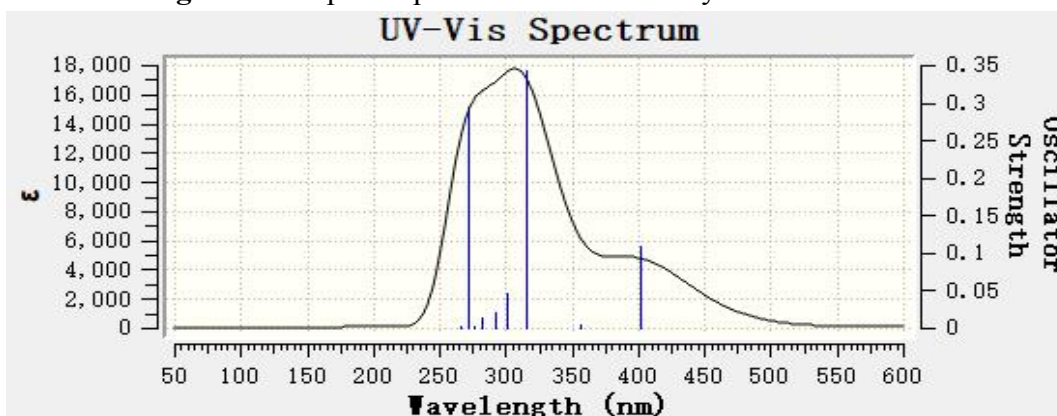

**Fig. S3** Absorption spectrum of **3** in THF by DFT calculation

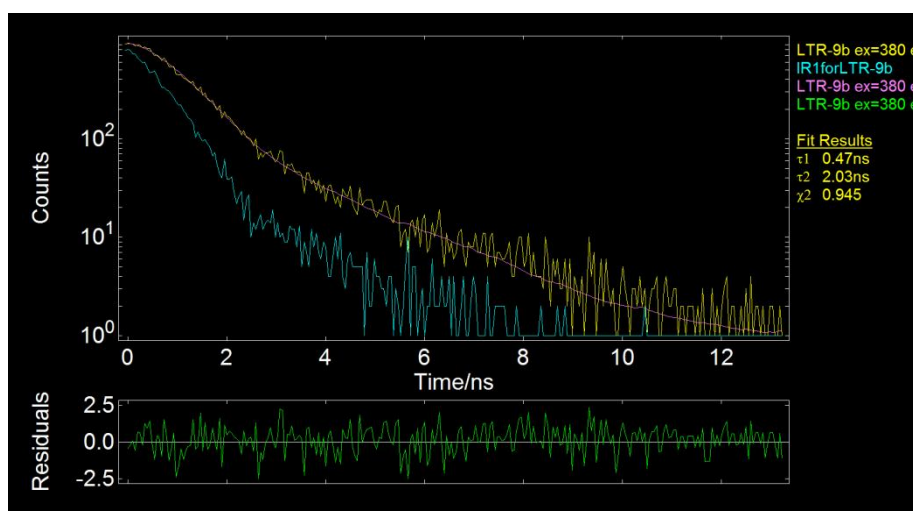

**Fig. S4.** PL decay curves of solid sample of **1** ( $\lambda_{\text{ex}} = 380 \text{ nm}$ )

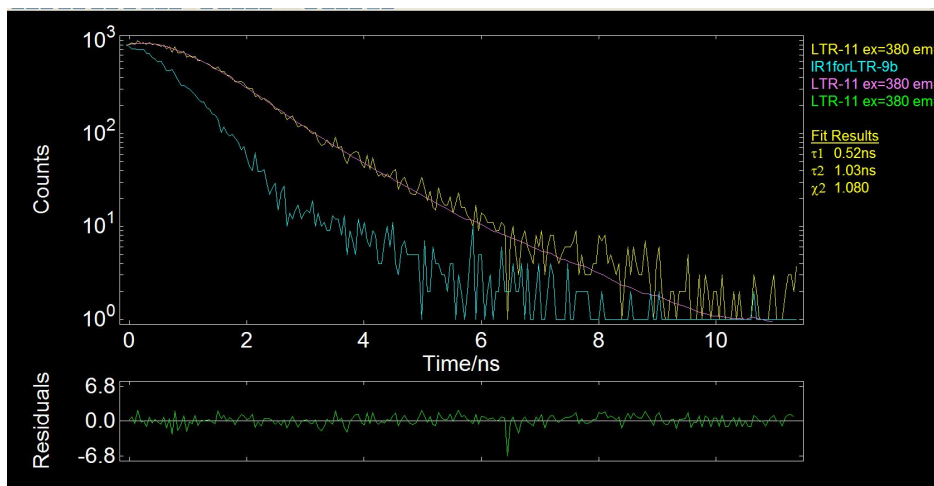

**Fig. S5.** PL decay curves of solid sample of **2** ( $\lambda_{\text{ex}} = 380 \text{ nm}$ )

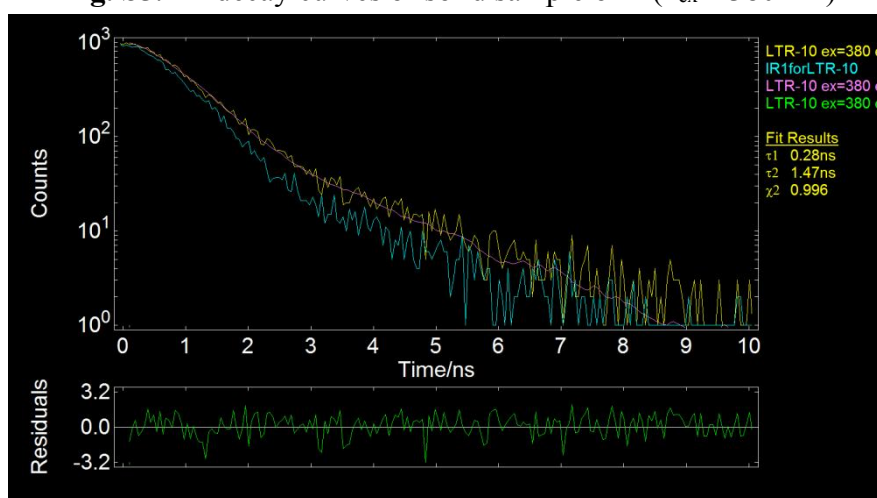

**Fig. S6.** PL decay curves of solid sample of **3** ( $\lambda_{\text{ex}} = 380 \text{ nm}$ )

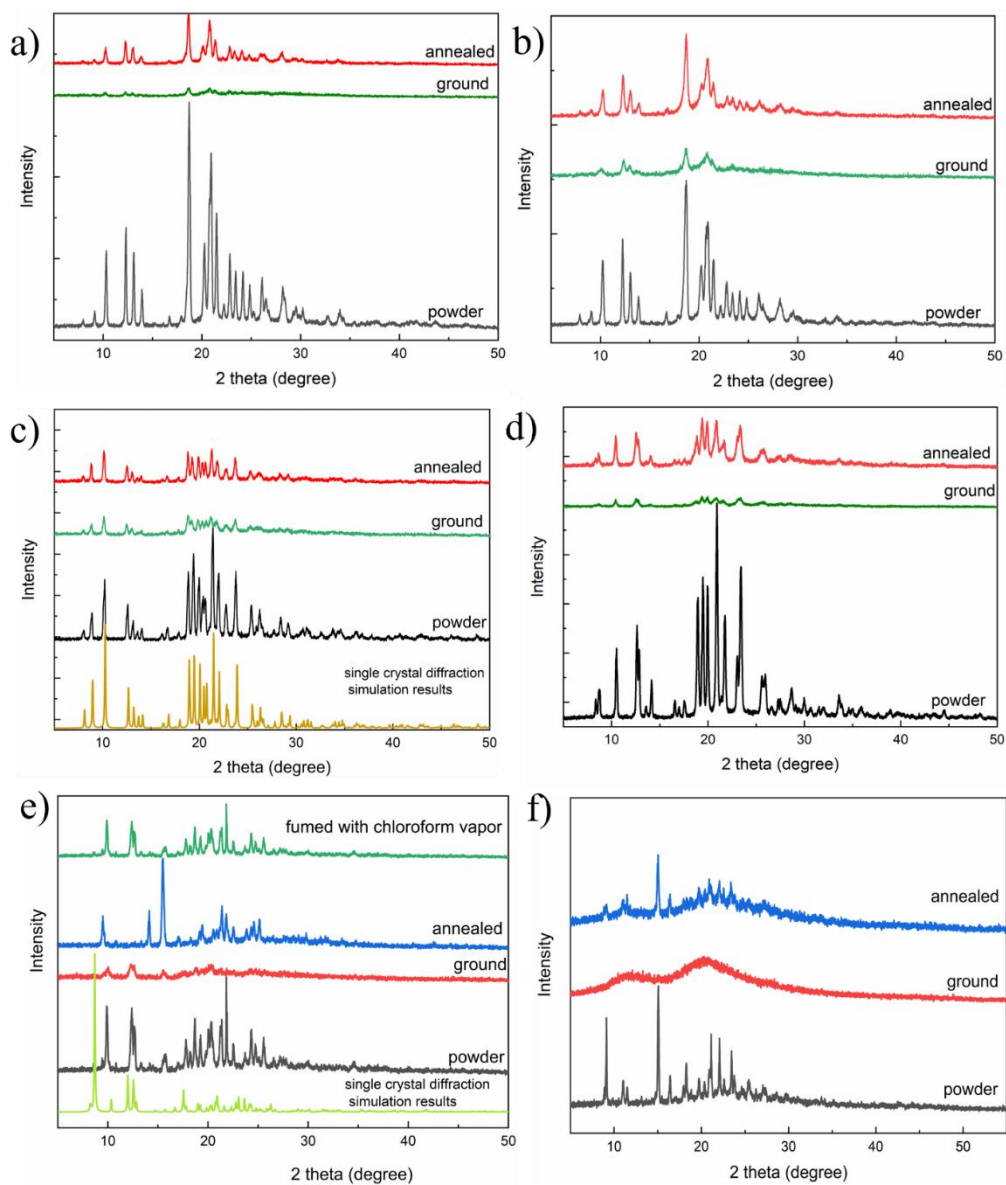

**Fig. S7** PXRD patterns of a) **1**, b) **TPE-4CHO**, c) **2**, d) **TPE-3CHO** e) **3** and f) **TPE-2CHO** before and after grinding, and then annealed/fumed

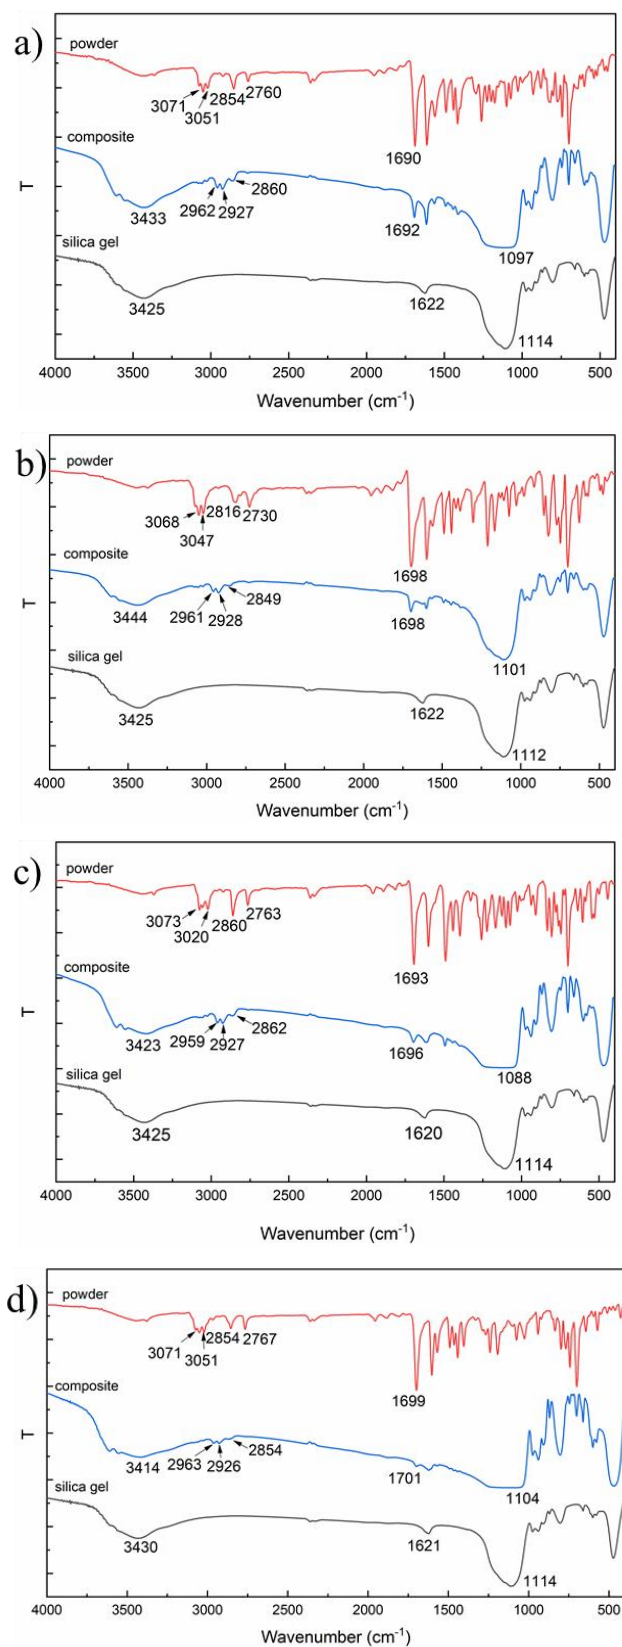

**Fig. S8** FT-IR spectra of silica gel composites of a) **1**, b) **TPE-4CHO**, c) **2** and d) **3** at room temperature



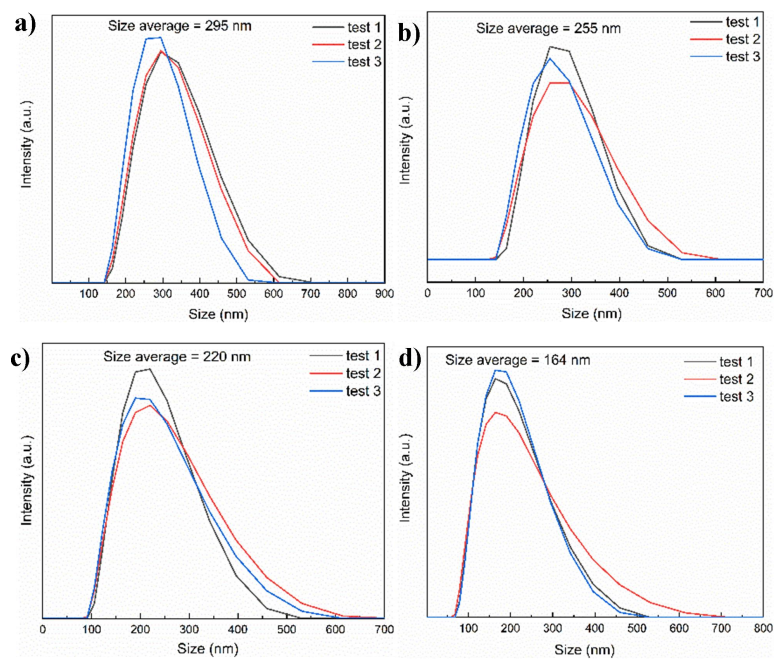

**Fig. S9** DLS results of the aggregates of compound 1 with water fractions of a) 90%, b) 92%, c) 95% and d) 96%

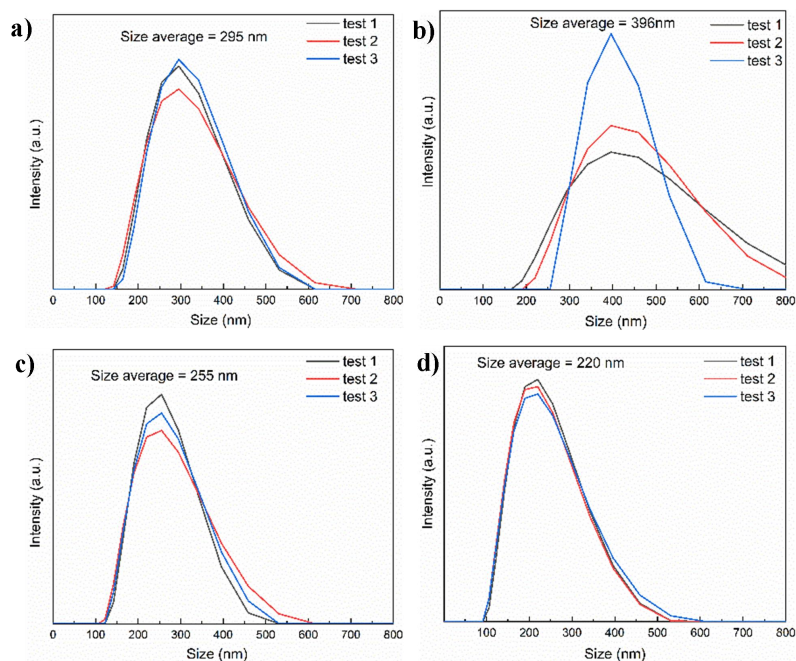

**Fig. S10** DLS results of the aggregates of compound 2 with water fractions of a) 90%, b) 92%, c) 95% and d) 96%

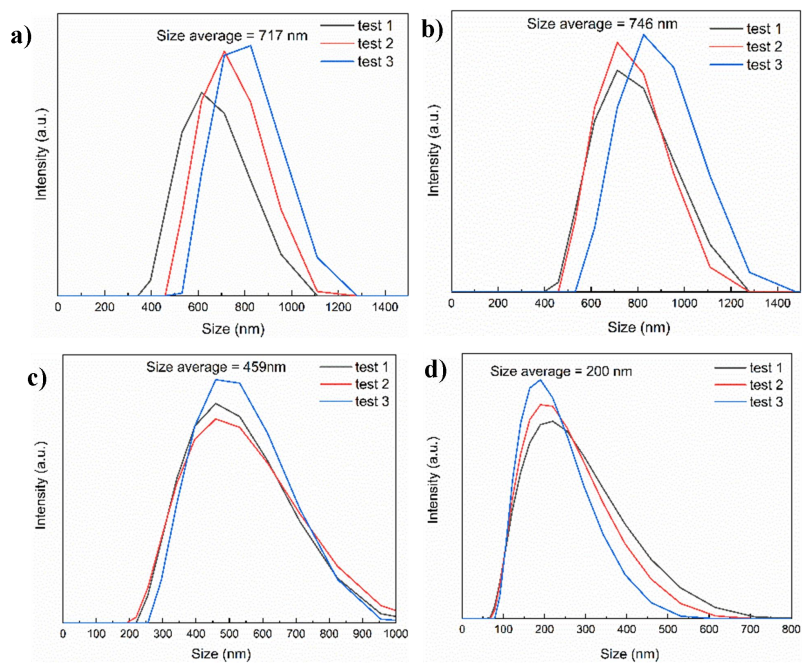

**Fig. S11** DLS results of the aggregates of compound **3** with water fractions of a) 90%, b) 92%, c) 95% and d) 96%

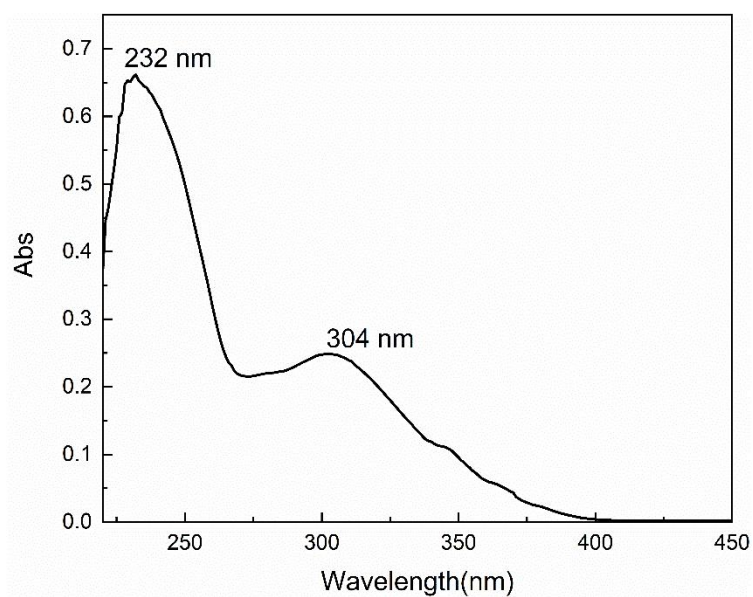

**Fig. S12** Absorption spectrum of **TPE-2CHO** in THF ( $2 \times 10^{-5}$  mol/L)

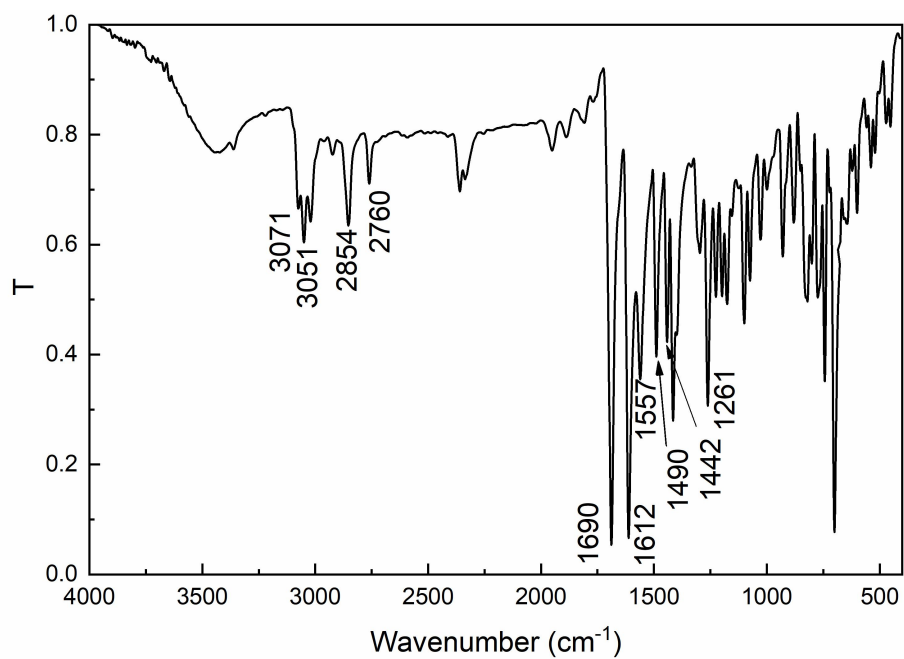

**Fig. S13** FT-IR spectrum of **1** (KBr pellet)

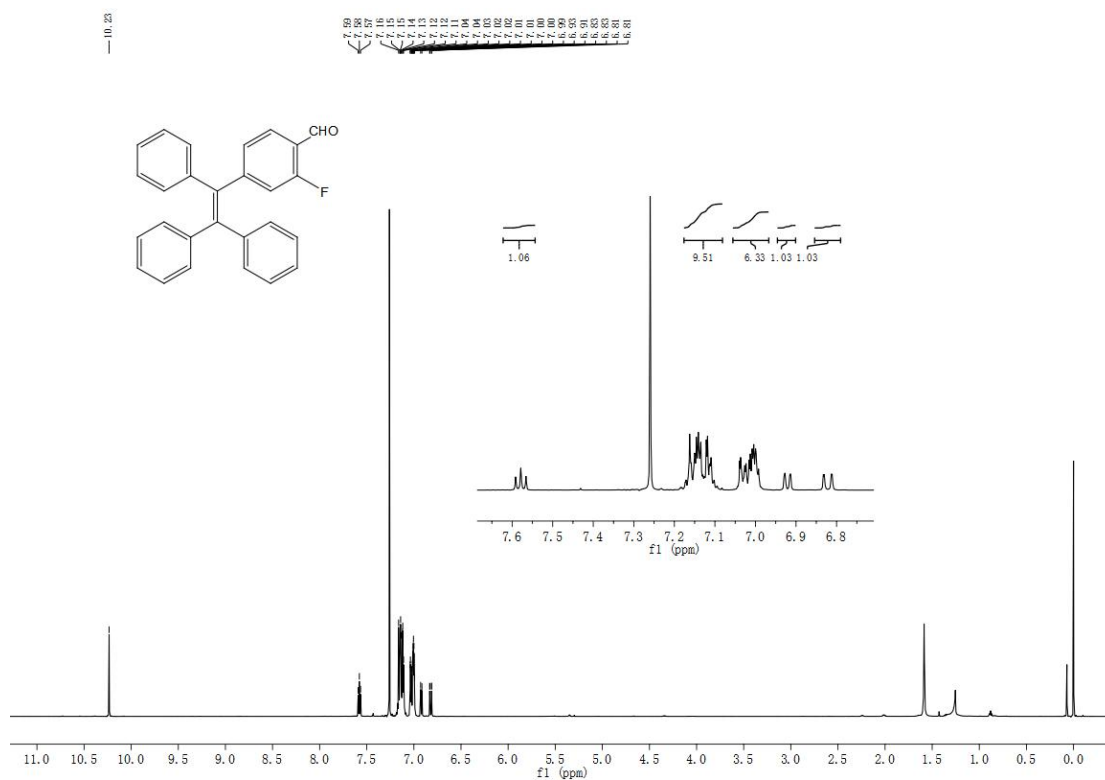

**Fig. S14**  $^1\text{H-NMR}$  spectrum of **1** in  $\text{CDCl}_3$

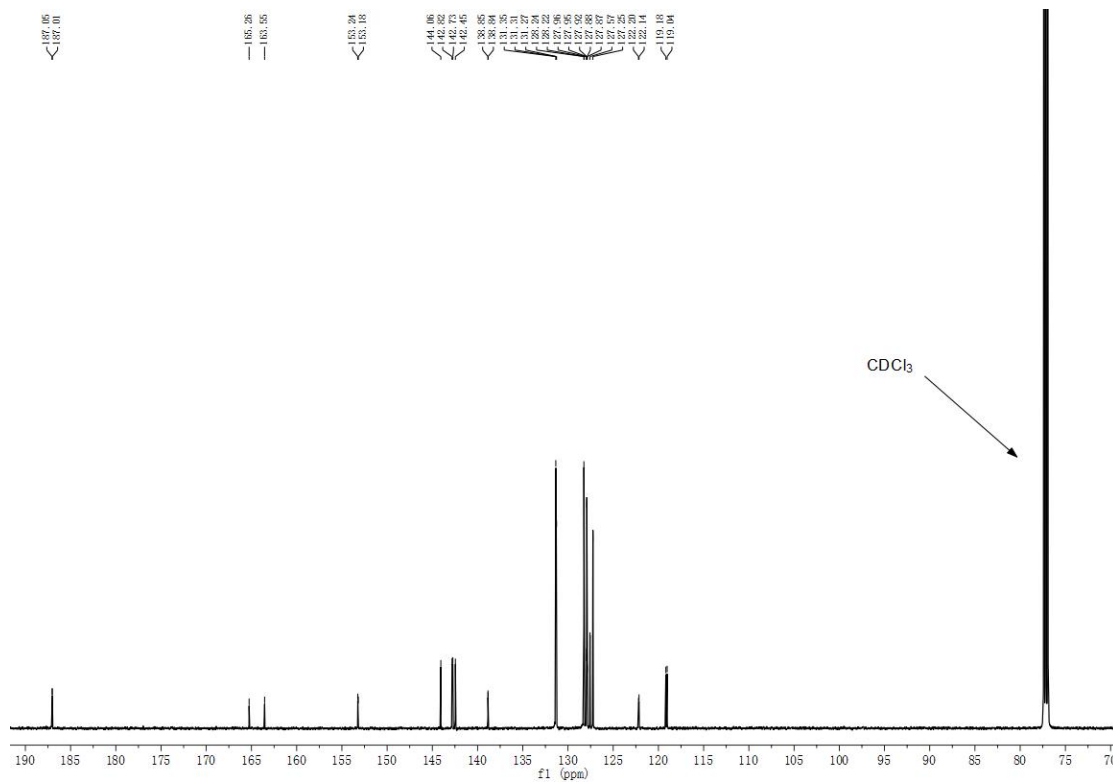

**Fig. S15** <sup>13</sup>C-NMR spectrum of **1** in CDCl<sub>3</sub>

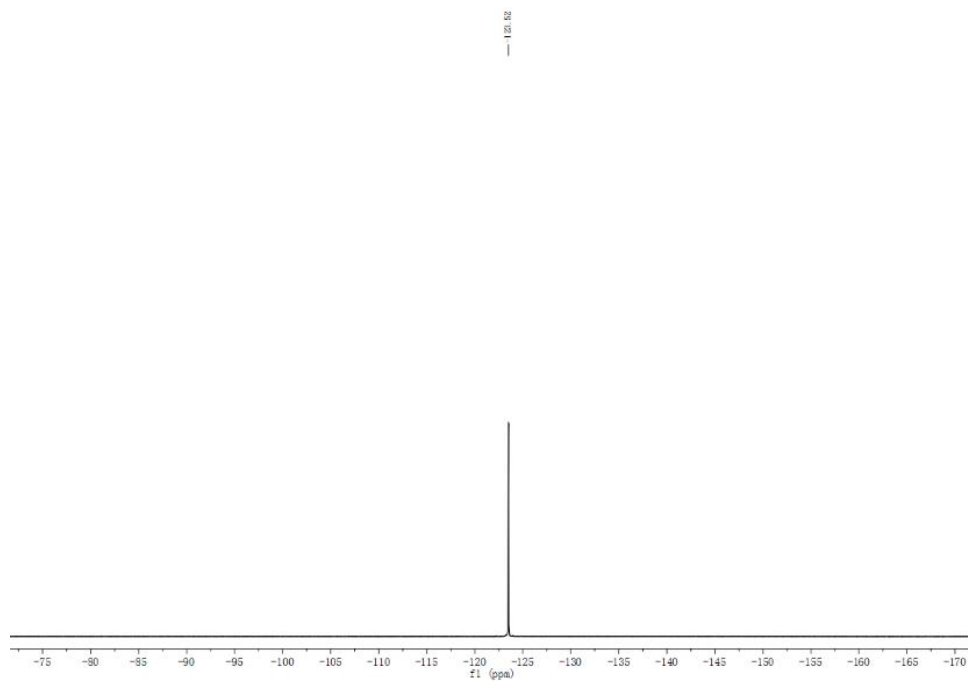

**Fig. S16** <sup>19</sup>F-NMR spectrum of **1** in dichloromethane

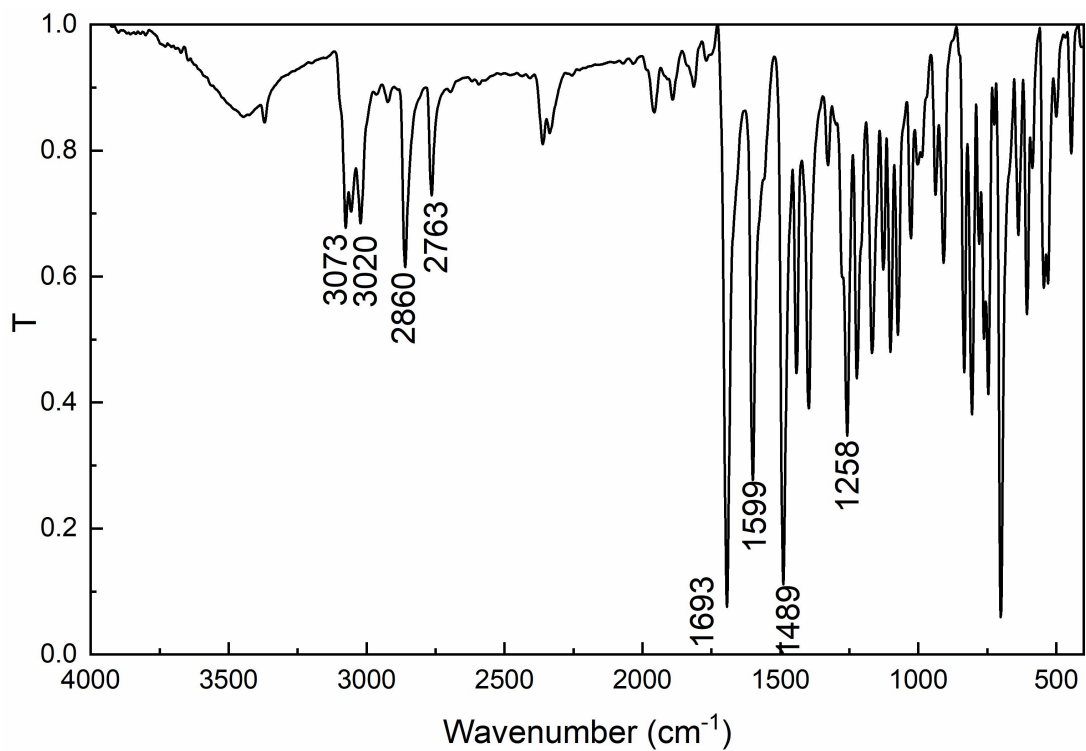

**Fig. S17** FT-IR spectrum of **2** (KBr pellet)

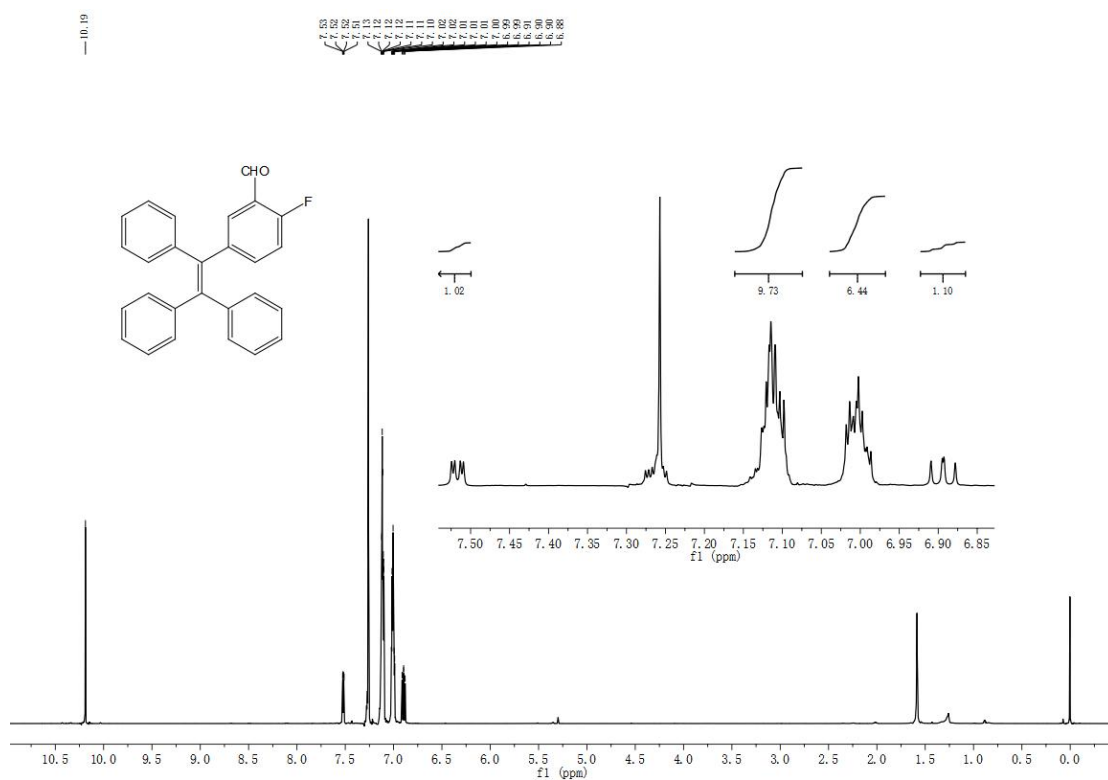

**Fig. S18** <sup>1</sup>H-NMR spectrum of **2** in CDCl<sub>3</sub>

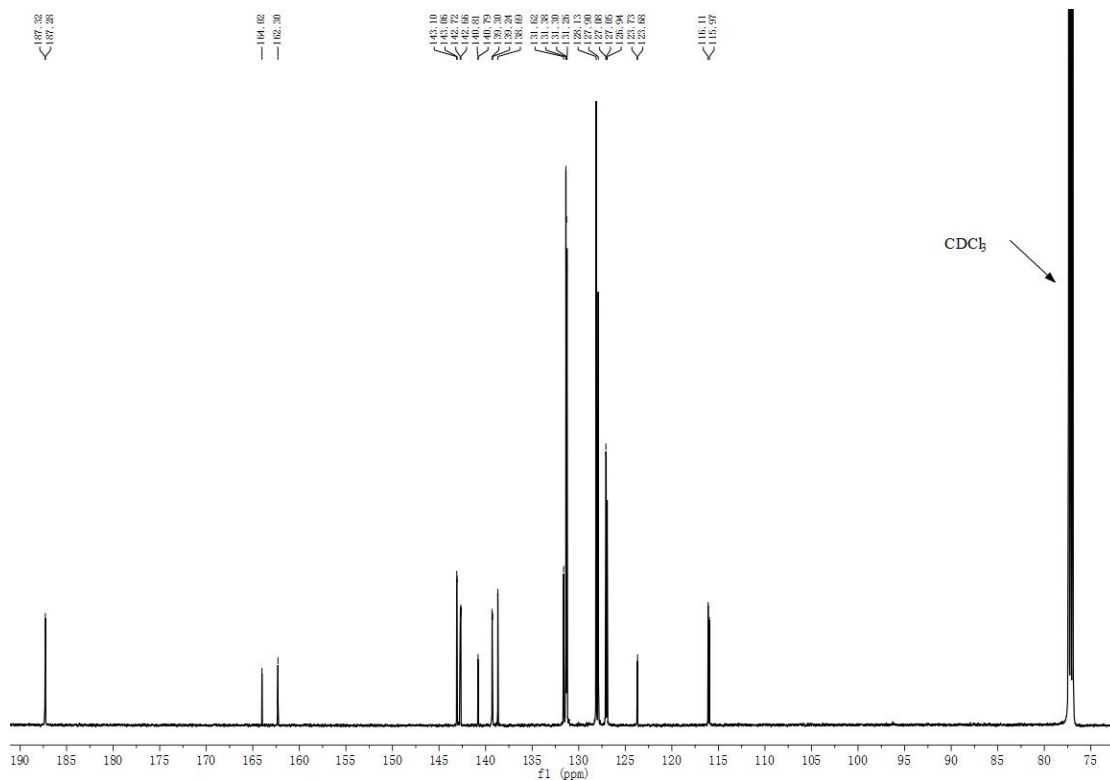

**Fig. S19** <sup>13</sup>C-NMR spectrum of **2** in CDCl<sub>3</sub>

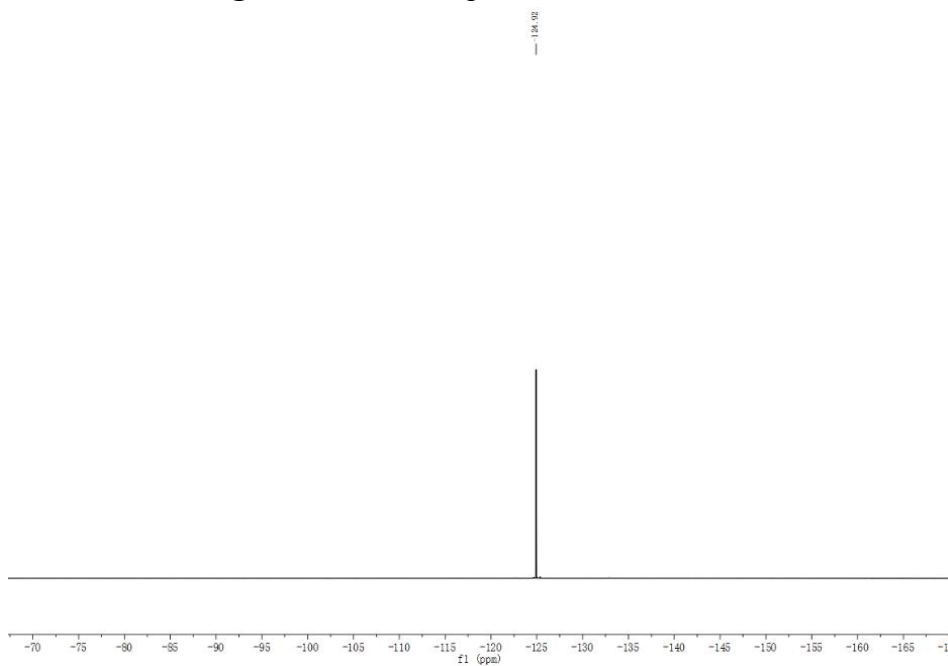

**Fig. S20** <sup>19</sup>F-NMR spectrum of **2** in dichloromethane

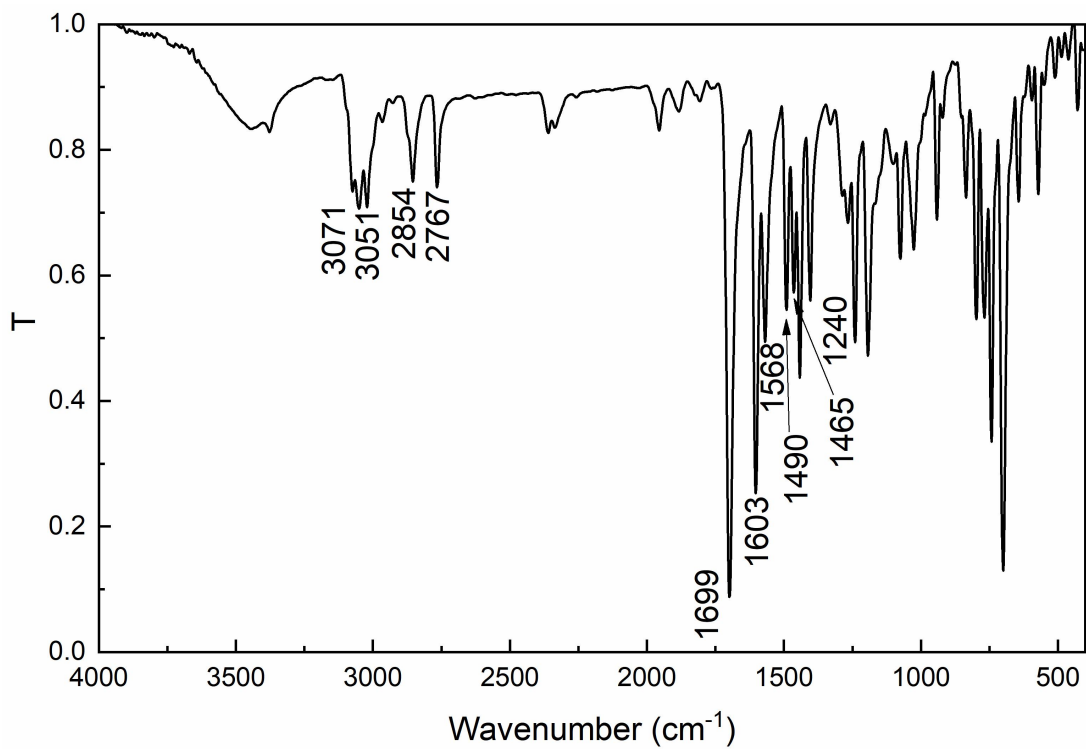

**Fig. S21** FT-IR spectrum of **3** (KBr pellet)

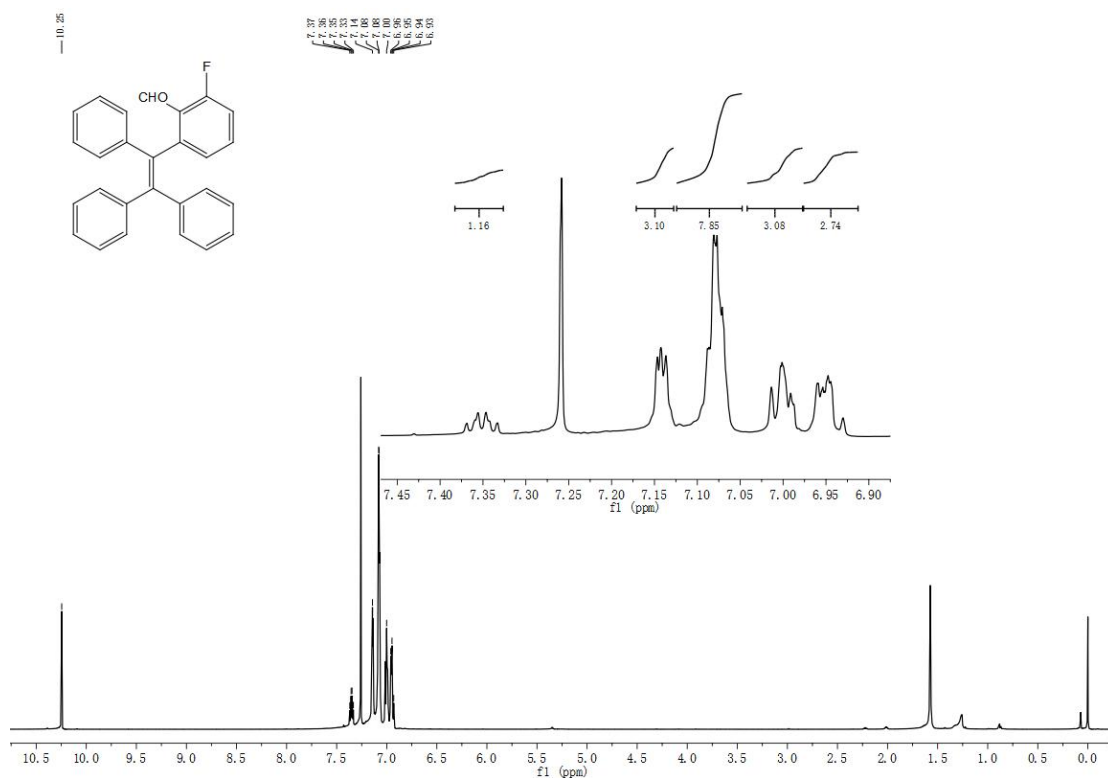

**Fig. S22**  $^1\text{H-NMR}$  spectrum of **3** in  $\text{CDCl}_3$

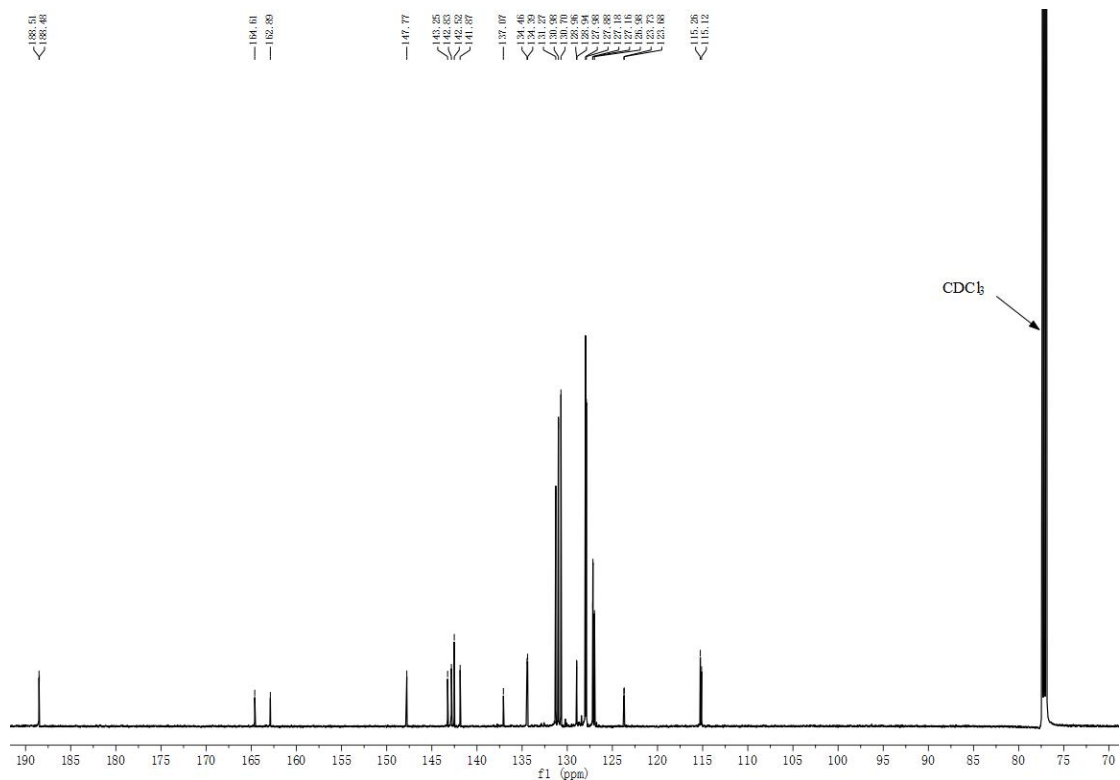

**Fig. S23**  $^{13}\text{C}$ -NMR spectrum of **3** in  $\text{CDCl}_3$

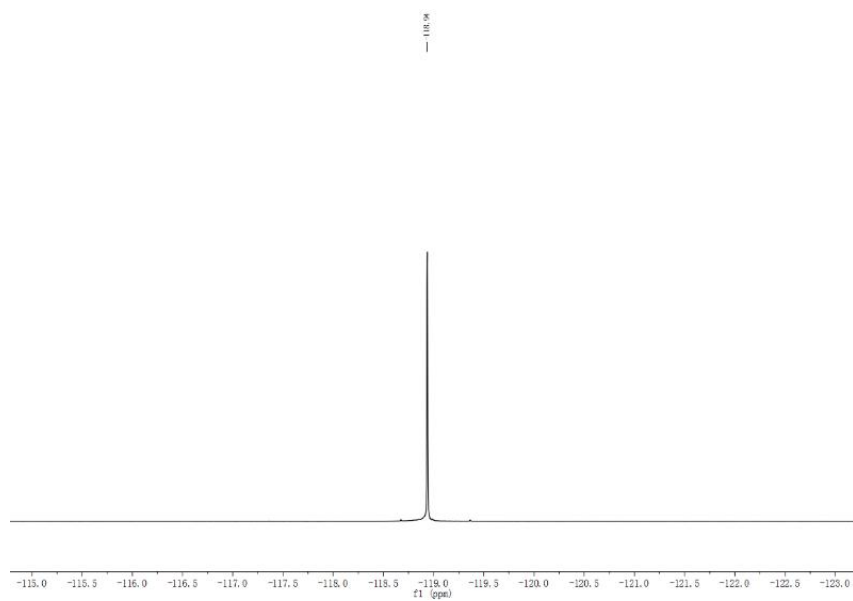

**Fig. S24**  $^{19}\text{F}$ -NMR spectrum of **3** in dichloromethane



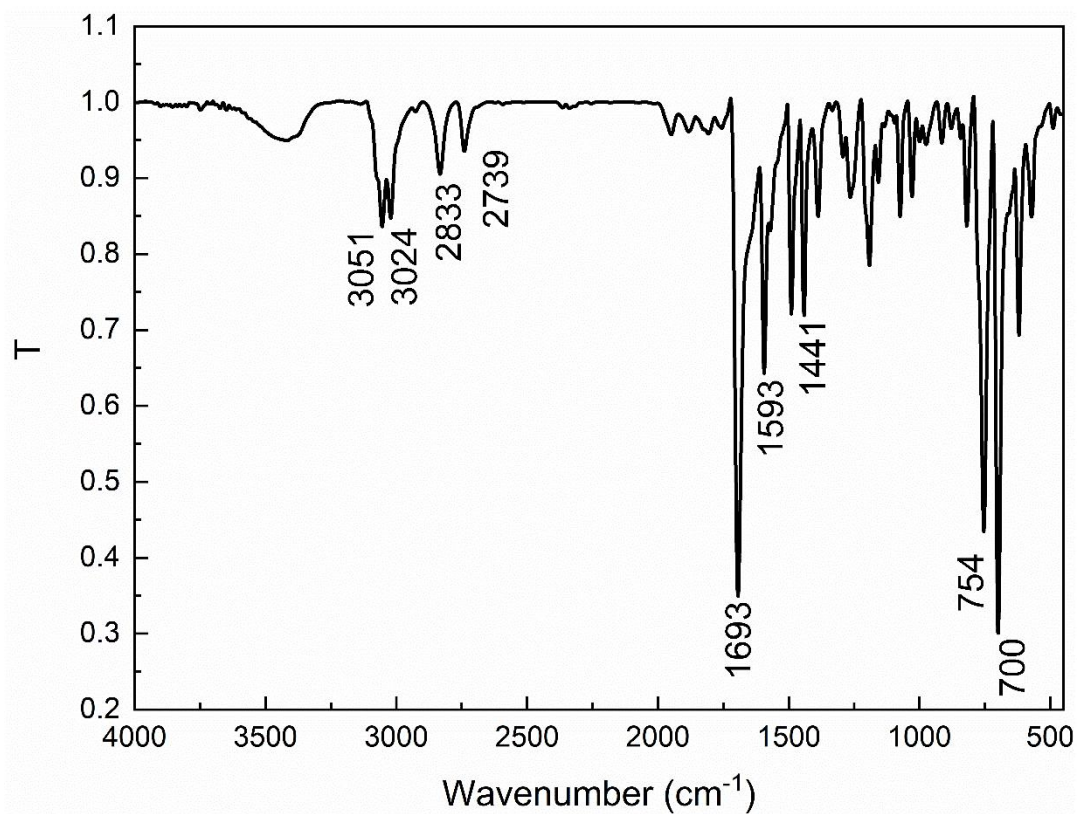

**Fig. S25** FT-IR spectrum of **TPE-2CHO** (KBr pellet)

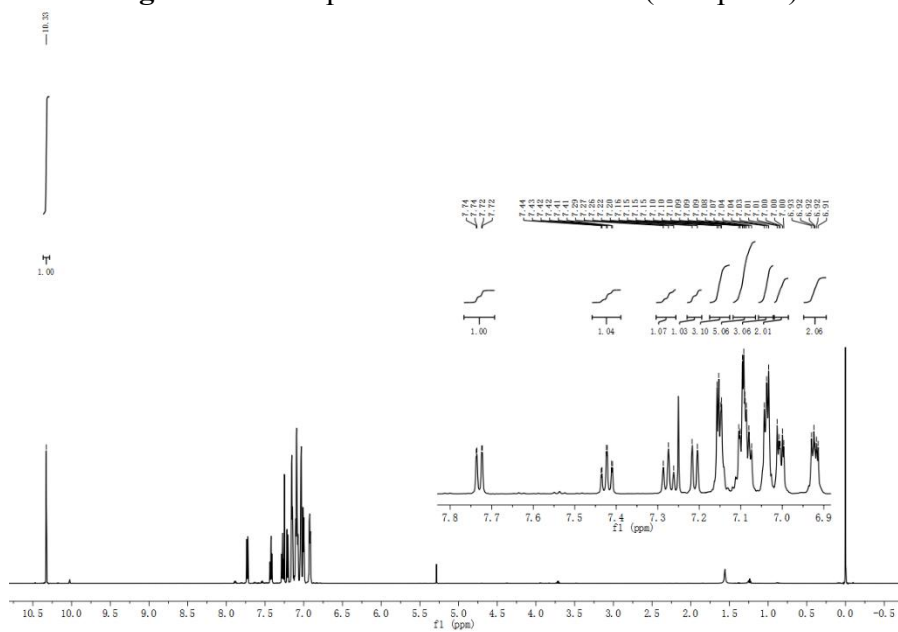

**Fig. S26** <sup>1</sup>H-NMR spectrum of **TPE-2CHO** in CDCl<sub>3</sub>

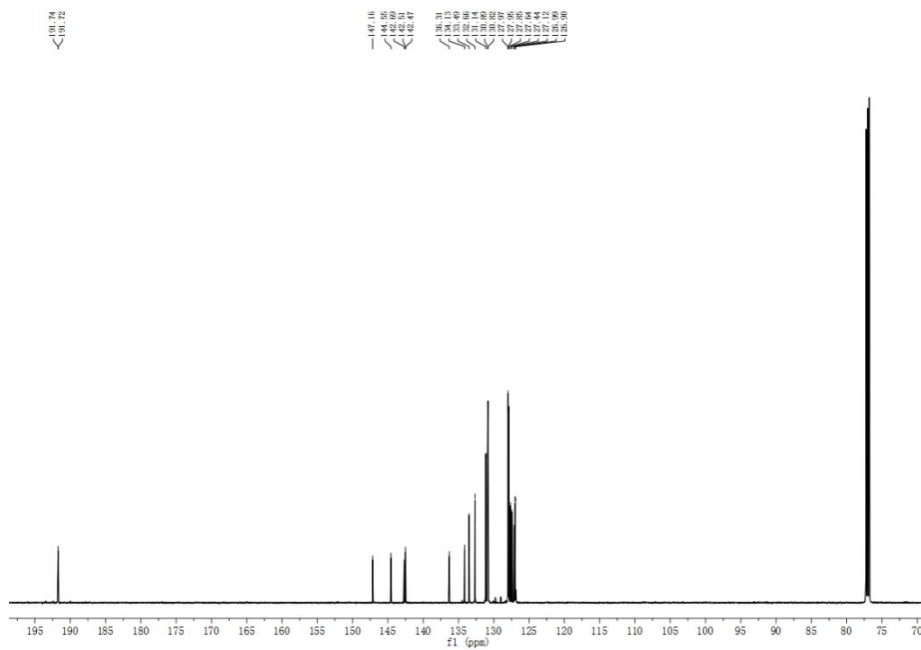

**Fig. S27**  $^{13}\text{C}$ -NMR spectrum of **TPE-2CHO** in  $\text{CDCl}_3$
